# Supplementary material for: Beer Phenolic Composition of Simple Phenols, Prenylated Flavonoids and Alkylresorcinols
Source: PubMed Central journal article supplement (PMC7321207; doi:10.3390/molecules25112582), 2020-06-02
Supplement: molecules-25-02582-s001.pdf [file molecules-25-02582-s001.pdf]

## Supporting information

**Table S1.** List and characteristics of the analyzed beers ( $n = 45$ ).

| Type                         | Commercial Name    | Style              | ABV (%) | IBU  | Country     |
|------------------------------|--------------------|--------------------|---------|------|-------------|
| Ale<br>( $n = 18$ )          | Lefte Radieuse     | Belgian strong ale | 8,2     | 25   | Belgium     |
|                              | Delirium Tremens   | Belgian strong ale | 8,5     | 26   | Belgium     |
|                              | Judas              | Belgian strong ale | 8,5     | 25   | Belgium     |
|                              | Lefte Blonde       | Blonde ale         | 6.6     | 20   | Belgium     |
|                              | Espiga Blonde Ale  | Blonde ale         | 4,5     | 25   | Spain       |
|                              | Damm complot IPA   | IPA                | 6.6     | 47   | Spain       |
|                              | Moritz Red IPA     | IPA                | 5,4     | 50   | Spain       |
|                              | Espiga Black IPA   | IPA                | 8,5     | 78   | Spain       |
|                              | IPA Montseny       | IPA                | 6,4     | 48   | Spain       |
|                              | Montseny Lupulus   | IPA                | 5,4     | 29   | Spain       |
|                              | Vic Ale IPA        | IPA                | 6,2     | 50   | Spain       |
|                              | Espiga Pale Ale    | Pale ale           | 5,0     | 30   | Spain       |
|                              | Guinness           | Stout              | 4,3     | 45   | Ireland     |
|                              | Montseny Negra     | Stout              | 5,2     | 35   | Spain       |
|                              | Hoegaarden         | Wheat              | 4,9     | 15   | Belgium     |
|                              | Paulaner           | Wheat              | 5,5     | 12   | Germany     |
|                              | Franziskaner       | Wheat              | 5,0     | 12   | Germany     |
|                              | Socarrada          | Winter ale         | 5,0     | 24   | Spain       |
| Non-alcoholic<br>( $n = 5$ ) | Free Damm          |                    | 0,0     | 17   | Spain       |
|                              | Ambar 0,0          |                    | 0,0     | 17   | Spain       |
|                              | Moritz 0,0         |                    | 0,0     | 17   | Spain       |
|                              | Heineken 0,0       |                    | 0,0     | 18   | Netherlands |
|                              | San Miguel 0,0     |                    | 0,0     | 17   | Spain       |
| Lager<br>( $n = 22$ )        | San Miguel Selecta | Amber lager        | 6.2     | 32   | Spain       |
|                              | Voll Damm          | Amber lager        | 7.2     | 34   | Spain       |
|                              | Bock damm          | Bock               | 5.9     | 25   | Spain       |
|                              | Mahou Negra        | Dark lager         | 5.5     | 25   | Spain       |
|                              | Saaz Damm          | Lite lager         | 3.5     | 10.5 | Spain       |
|                              | Alhambra 1925      | Pale lager         | 6.4     | 25   | Spain       |
|                              | Mahou Maestra      | Pale lager         | 7.5     | 28   | Spain       |

|                         |            |     |    |                |
|-------------------------|------------|-----|----|----------------|
| Xibeca                  | Pale lager | 4.6 | 18 | Spain          |
| Moritz                  | Pale lager | 5.4 | 21 | Spain          |
| Estrella Damm           | Pale lager | 5.4 | 12 | Spain          |
| Brutus                  | Pale lager | 6.0 | 23 | Spain          |
| Stella Artois           | Pale lager | 5.2 | 24 | Belgium        |
| Alhambra Especial       | Pale lager | 5,4 | 17 | Spain          |
| A.K. Damm               | Pale lager | 4,8 | 13 | Spain          |
| Estrella Galicia        | Pale lager | 5,5 | 24 | Spain          |
| Heineken                | Pale lager | 5,0 | 16 | Netherlands    |
| Pilsner Urquell         | Pale lager | 4,4 | 40 | Czech Republic |
| Corona                  | Pale lager | 4,5 | 19 | Mexico         |
| Radeberger              | Pale lager | 4,8 | 33 | Germany        |
| Schwaben Bräu Das Helle | Pale lager | 5,0 | 15 | Germany        |
| Cruzcampo Gran Reserva  | Special    | 6,4 | 25 | Spain          |
| Malquerida              | Special    | 5,0 | 19 | Spain          |

%ABV = percentage of alcohol by volume. IBU = International bitterness units.
